# Supplementary material for: Taipei Medical University Clinical Research Database: a collaborative hospital EHR database aligned with international common data standards
Source: PubMed Central journal article supplement (PMC11097871; doi:10.1136/bmjhci-2023-100890), 2024-05-14
Supplement: bmjhci-2023-100890supp001.pdf [file bmjhci-2023-100890supp001.pdf]

## Taipei Medical University Clinical Research Database (TMUCRD) – A Collaborative Hospital EHR Database Aligned with International Common Data Standards

### Supplement

#### Table of Contents

|                                                                             |          |
|-----------------------------------------------------------------------------|----------|
| <b>Figure S1. TMUCRD Relationship Diagram .....</b>                         | <b>2</b> |
| <b>Table S1. Detailed information of laboratory tests from TMUCRD .....</b> | <b>3</b> |

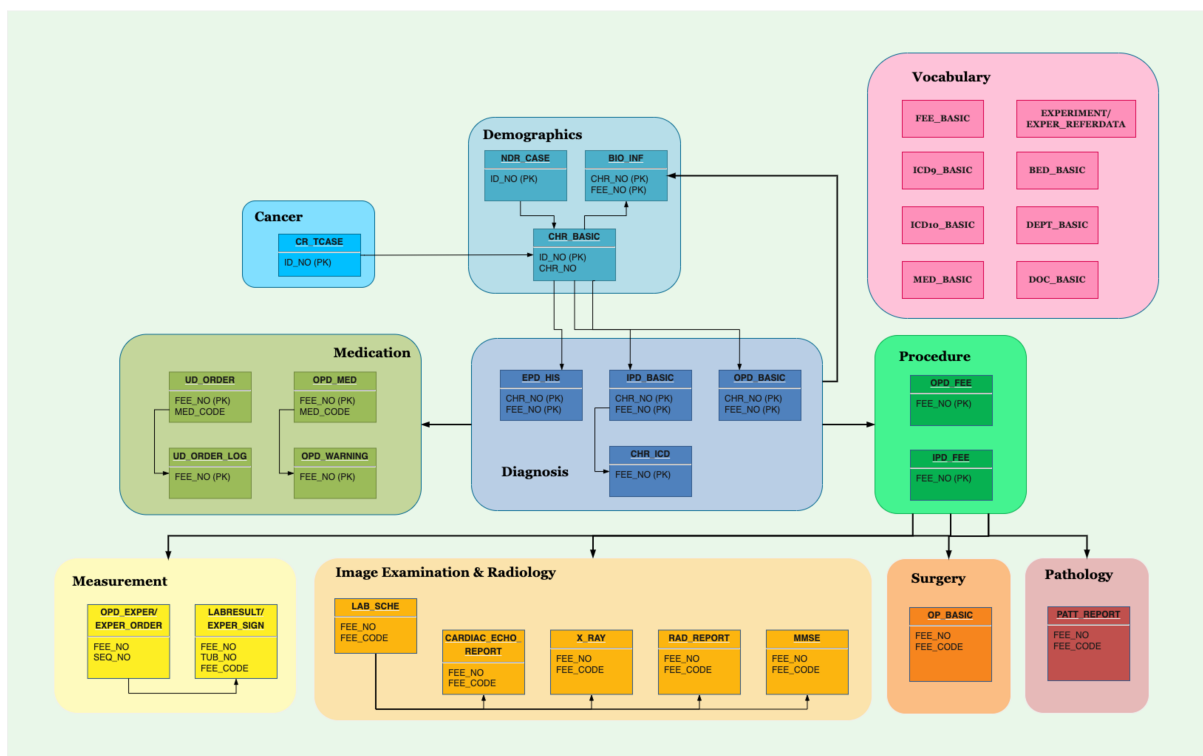

Figure S1. TMUCRD Relationship Diagram

Note: TMUCRD, Taipei Medical University Clinical Research Database;

**Table S1.** Detailed information of laboratory tests from TMUCRD

| Year | WFH,<br>n (million) | SHH,<br>n (million) | TMUH,<br>n (million) | #Patients,<br>n (thousand) |
|------|---------------------|---------------------|----------------------|----------------------------|
| 2004 | 1.151               | 0                   | 0                    | 90.6                       |
| 2005 | 1.010               | 0                   | 0                    | 84.8                       |
| 2006 | 1.053               | 0                   | 0                    | 96                         |
| 2007 | 1.138               | 0                   | 0                    | 98.2                       |
| 2008 | 1.133               | 0.183               | 0                    | 117.8                      |
| 2009 | 1.200               | 0.724               | 0                    | 159.9                      |
| 2010 | 1.188               | 1.059               | 0                    | 171.5                      |
| 2011 | 1.011               | 1.280               | 0.062                | 162                        |
| 2012 | 1.468               | 1.504               | 1.725                | 300.4                      |
| 2013 | 1.557               | 1.670               | 1.963                | 315.5                      |
| 2014 | 1.501               | 1.739               | 2.145                | 315.6                      |
| 2015 | 2.825               | 1.873               | 2.335                | 350.9                      |
| 2016 | 3.372               | 2.201               | 2.342                | 372.1                      |
| 2017 | 3.428               | 2.485               | 2.384                | 377.6                      |
| 2018 | 3.477               | 2.722               | 2.318                | 381.1                      |
| 2019 | 3.636               | 3.025               | 2.277                | 392.1                      |
| 2020 | 3.732               | 3.022               | 2.108                | 369.6                      |
| 2021 | 3.799               | 3.038               | 2.208                | 359.2                      |

**Note:** WFH, Wan-Fang Hospital; SHH, Shuang-Ho Hospital; TMUH, Taipei Medical University Hospital; TMUCRD, Taipei Medical University Clinical Research Database;
